# Supplementary material for: COVID-19 Acute Respiratory Distress Syndrome: Treatment with Helmet CPAP in Respiratory Intermediate Care Unit by Pulmonologists in the Three Italian Pandemic Waves
Source: MDPI journal article supplement (doi:10.3390/arm91050030), 2023-09-20
Supplement: s1 [file s1]

Article

# COVID-19 Acute Respiratory Distress Syndrome: Treatment with Helmet CPAP in Respiratory Intermediate Care Unit by Pulmonologists in the Three Italian Pandemic Waves

Martina Piluso <sup>1</sup>, Clarissa Ferrari <sup>2</sup>, Silvia Pagani <sup>1,\*</sup>, Pierfranco Usai <sup>1</sup>, Stefania Raschi <sup>1</sup>, Luca Parachini <sup>1</sup>, Elisa Oggionni <sup>1</sup>, Chiara Melacini <sup>1</sup>, Francesca D'Arcangelo <sup>1</sup>, Roberta Cattaneo <sup>1</sup>, Cristiano Bonacina <sup>1</sup>, Monica Bernareggi <sup>1</sup>, Serena Bencini <sup>1</sup>, Marta Nadalin <sup>3</sup>, Mara Borelli <sup>3</sup>, Roberto Bellini <sup>1</sup>, Maria Chiara Salandini <sup>1</sup> and Paolo Scarpazza <sup>1</sup>

<sup>1</sup> Lung Unit, Cardiothoracic Vascular Department Vimercate Hospital, 20871 Vimercate, Italy; martina.piluso@asst-brianza.it (M.P.); pierfranco.usai@asst-brianza.it (P.U.); stefania.raschi@asst-brianza.it (S.R.); luca.parachini@asst-brianza.it (L.P.); elisa.oggionni@asst-brianza.it (E.O.); chiara.melacini@asst-brianza.it (C.M.); francesca.darcangelo@asst-brianza.it (F.D.); roberta.cattaneo@asst-brianza.it (R.C.); cristiano.bonacina@asst-brianza.it (C.B.); monica.bernareggi@asst-brianza.it (M.B.); serena.bencini@asst-brianza.it (S.B.); roberto.bellini@asst-brianza.it (R.B.); mariachiara.salandini@asst-brianza.it (M.C.S.); paolo.scarpazza@asst-brianza.it (P.S.)

<sup>2</sup> Research and Clinical Trials Office, Poliambulanza Foundation Hospital, 25124 Brescia, Italy; claclafer@gmail.com

<sup>3</sup> School of Medicine, Surgery University of Milano Bicocca, Respiratory Unit, San Gerardo Hospital, 20900 Monza, Italy; maartanadalin@gmail.com (M.N.); maraborelli123@gmail.com (M.B.)

\* Correspondence: silvia.pagani91@gmail.com; Tel.: +39-0396657090

**Table S1.** Complication across the three waves.

|                                                                                                        | Wave 1<br>n=150 | Wave 2 n=180 | Wave 3<br>n=185 | Total | Chi-squared<br>test p value |
|--------------------------------------------------------------------------------------------------------|-----------------|--------------|-----------------|-------|-----------------------------|
| <b>death</b>                                                                                           | 42              | 37           | 24              | 103   |                             |
| <b>number of patients with Pulmonary Embolisms</b>                                                     | 4               | 28           | 22              | 54    | <b>&lt;0.001 #</b>          |
| deceased with Pulmonary Embolisms                                                                      | 1               | 7            | 5               | 13    | <b>0.033 §</b>              |
| <b>number of patients with thrombosis</b>                                                              | 4               | 3            | 1               | 8     | 0.291 #                     |
| deceased with thrombosis                                                                               | 3               | 0            | 0               | 3     | 0.106 §                     |
| <b>number of patients with bleedings</b>                                                               | 1               | 6            | 3               | 10    | 0.200 #                     |
| deceased with bleedings                                                                                | 0               | 2            | 1               | 3     | 0.332 §                     |
| <b>number of patients with supraventricular<br/>tackyarhythmias</b>                                    | 4               | 8            | 3               | 15    | 0.270 #                     |
| Paroxysmal Atrial Fibrillation                                                                         | 2               | 6            | 3               | 11    |                             |
| Paroxysmal Supraventricular Tachycardia                                                                | 2               | 2            | 0               | 4     |                             |
| deceased with tackyarhythmias                                                                          | 1               | 1            | 1               | 3     | 0.913 §                     |
| <b>number of patients with pneumomediastinum</b>                                                       | 2               | 7            | 6               | 15    | 0.368 #                     |
| deceased pneumomediastinum                                                                             | 1               | 3            | 4               | 8     | 0.113 §                     |
| <b>number of patients with pneumothoraxes</b>                                                          | 2               | 1            | 2               | 5     | 0.760 #                     |
| deceased pneumothoraxes                                                                                | 1               | 0            | 0               | 1     | 0.480 §                     |
| <b>number of patients with severe bacterial<br/>superinfections</b>                                    | 0               | 5            | 7               | 12    | 0.065 #                     |
| deceased with superinfections                                                                          | 0               | 1            | 2               | 3     | 0.153 §                     |
| § chi-squared test for assessing the distribution of deceased due to complication across wave deceased |                 |              |                 |       |                             |

**Table S2.** Univariate logistic regression models with H-CPAP success (yes vs no) as dependent variable (only significant variables/predictors are reported).

| Independent variables                                                                                      | Beta coefficient             | Odds Ratio (=exp(beta))    | Lower Lim OR 95% CI     | Upper Lim OR 95% CI     | p-value  |
|------------------------------------------------------------------------------------------------------------|------------------------------|----------------------------|-------------------------|-------------------------|----------|
| Worst PaO <sub>2</sub> /FiO <sub>2</sub> in H-CPAP (*100)                                                  | 4,2987                       | 73,6034                    | 65,780                  | 81,340                  | 2,77E-45 |
| Average FiO <sub>2</sub> in H-CPAP                                                                         | -0,0953                      | 0,9091                     | 0,890                   | 0,929                   | 4,66E-23 |
| d-dimer test (worst)                                                                                       | -0,0001                      | 0,9999                     | 1,000                   | 1,000                   | 2,81E-12 |
| APACHE II Score                                                                                            | -0,1555                      | 0,8560                     | 0,816                   | 0,898                   | 1,61E-11 |
| Lactate dehydrogenase (LDH) _ at admission                                                                 | -0,0036                      | 0,9964                     | 0,995                   | 0,998                   | 4,23E-09 |
| CARDS class_ First PaO <sub>2</sub> /FiO <sub>2</sub> in H-CPAP (ref cat. Pre-CARDS)                       | 0,8509<br>-0,2936<br>-1,1856 | 2,3417<br>0,7456<br>0,3056 | 1,232<br>0,759<br>0,138 | 4,451<br>2,372<br>0,678 | 1,72E-08 |
| Age                                                                                                        | -0,0509                      | 0,9504                     | 0,931                   | 0,970                   | 1,36E-07 |
| PaO <sub>2</sub> /FiO <sub>2</sub> after pronation (*100)                                                  | 0,5595                       | 1,7497                     | 1,470                   | 1,970                   | 4,67E-07 |
| PaO <sub>2</sub> /FiO <sub>2</sub> in oxygen (*100)                                                        | 0,7752                       | 2,1710                     | 1,890                   | 2,350                   | 7,52E-07 |
| First PaO <sub>2</sub> /FiO <sub>2</sub> in H-CPAP (*100)                                                  | 0,5594                       | 1,7497                     | 1,470                   | 1,970                   | 1,52E-06 |
| STEROIDS therapy                                                                                           | 1,5872                       | 4,8902                     | 2,418                   | 9,890                   | 5,52E-06 |
| Interleukin-6 at admission                                                                                 | -0,0065                      | 0,9935                     | 0,990                   | 0,997                   | 1,10E-05 |
| D-dimer at admission                                                                                       | -0,0001                      | 0,9999                     | 1,000                   | 1,000                   | 1,62E-05 |
| Antivirals                                                                                                 | -0,7380                      | 0,4781                     | 0,308                   | 0,741                   | 0,0011   |
| Smoke                                                                                                      | -0,0458                      | 0,9552                     | 0,364                   | 2,509                   | 0,0031   |
| Hypertension                                                                                               | -0,5032                      | 0,6046                     | 0,411                   | 0,889                   | 0,0098   |
| Waves wave 2 vs 1                                                                                          | 0,3314                       | 1,3930                     | 0,882                   | 2,201                   | 0,0134   |
| wave 3 vs 1                                                                                                | 0,7051                       | 2,0240                     | 1,259                   | 3,253                   |          |
| Ischemic cardiac disease                                                                                   | -0,6588                      | 0,5175                     | 0,299                   | 0,897                   | 0,0208   |
| [PaO <sub>2</sub> /FiO <sub>2</sub> after pronation - PaO <sub>2</sub> /FiO <sub>2</sub> in oxygen] (*100) | 2,22E-05                     | 1,00002                    | 1,000003                | 1,00004                 | 0,0213   |
| Cardiovascular disease                                                                                     | -0,5610                      | 0,5707                     | 0,356                   | 0,916                   | 0,0219   |
| plaquenil therapy                                                                                          | -0,4577                      | 0,6327                     | 0,421                   | 0,951                   | 0,0287   |
| Average PEEP                                                                                               | -0,0445                      | 0,9565                     | 0,911                   | 1,004                   | 0,0354   |
| Chronic renal failure                                                                                      | -0,8165                      | 0,4420                     | 0,203                   | 0,964                   | 0,0433   |

**Table S3.** Univariate Logistic regression models with Death (yes vs no) as dependent variable (only significant variables/predictors are reported).

| Independent variable                                          | Beta coefficient | Odds Ratio (=exp(beta)) | Lower Lim OR 95% CI | Upper Lim OR 95% CI | p-value  |
|---------------------------------------------------------------|------------------|-------------------------|---------------------|---------------------|----------|
| Worst PaO <sub>2</sub> /FiO <sub>2</sub> in CPAP (*100)       | -3,6563          | 0,026                   | 0,010               | 0,067               | 6,92E-28 |
| APACHE II score                                               | 0,1966           | 1,217                   | 1,150               | 1,288               | 1,34E-13 |
| Average FiO <sub>2</sub> in CPAP                              | 0,0707           | 1,073                   | 1,050               | 1,097               | 5,34E-12 |
| Age                                                           | 0,0806           | 1,084                   | 1,055               | 1,113               | 3,16E-11 |
| STEROID therapy                                               | -1,7226          | 0,179                   | 0,090               | 0,356               | 1,57E-06 |
| D-dimer at admission                                          | 0,0001           | 1,000                   | 1,000               | 1,000               | 4,59E-06 |
| Lactate dehydrogenase at admission                            | 0,0029           | 1,003                   | 1,002               | 1,004               | 7,90E-06 |
| Interleukin-6 at admission                                    | 0,0068           | 1,007                   | 1,004               | 1,010               | 1,17E-05 |
| Smoke                                                         | -1,3171          | 0,268                   | 0,035               | 0,284               | 3,73E-05 |
| PaO <sub>2</sub> /FiO <sub>2</sub> in oxygen (*100)           | -0,7283          | 0,483                   | 0,237               | 0,947               | 6,73E-05 |
| CARDS class_ first PaO <sub>2</sub> /FiO <sub>2</sub> in CPAP | -0,7846          | 0,456                   | 0,218               | 0,957               | 0,0002   |
| Hypertension                                                  | 0,7872           | 2,197                   | 1,387               | 3,480               | 0,0006   |
| ANTIVIRALS therapy                                            | 0,8548           | 2,351                   | 1,456               | 3,796               | 0,0006   |
| Cardiovascular disease                                        | 0,8997           | 2,459                   | 1,481               | 4,081               | 0,0007   |
| PaO <sub>2</sub> /FiO <sub>2</sub> after pronation (*100)     | -0,4264          | 0,653                   | 0,390               | 0,844               | 0,0009   |
| Ischemic cardiac disease                                      | 0,9833           | 2,673                   | 1,501               | 4,762               | 0,0013   |

|                                                         |         |       |       |       |        |
|---------------------------------------------------------|---------|-------|-------|-------|--------|
| First PaO <sub>2</sub> /FiO <sub>2</sub> in CPAP (*100) | -0,4034 | 0,668 | 0,325 | 0,899 | 0,0021 |
| Wave                                                    | -0,4075 | 0,665 | 1,400 | 1,105 | 0,0026 |
| Chronic renal failure                                   | 1,2499  | 3,490 | 1,580 | 7,710 | 0,0030 |
| Diabetes type II (yes vs no)                            | 0,7455  | 2,108 | 1,264 | 3,514 | 0,0055 |
